# Supplementary material for: ATM phosphorylation of the actin-binding protein drebrin controls oxidation stress-resistance in mammalian neurons and C. elegans
Source: Springer Nature journal article supplement (doi:10.1038/s41467-019-08420-w), 2019-01-30
Supplement: MOESM2 [file 41467_2019_8420_MOESM2_ESM.pdf]

**ATM phosphorylation of the actin-binding protein drebrin controls oxidation  
stress-resistance in mammalian neurons and *C. elegans***  
*Kreis et al.*

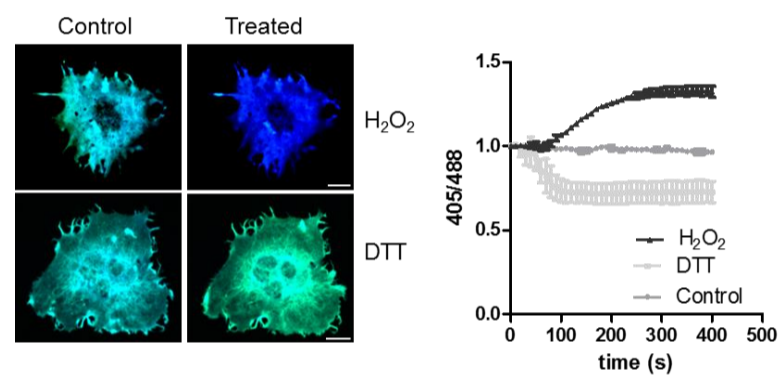

**Supplementary Figure 1. Validation of the DBN-roGFP construct in monitoring redox changes**

COS cells were transfected with DBN-roGFP and imaged 24 h later using spinning disk microscopy. Cells were treated with 0.1 mM H<sub>2</sub>O<sub>2</sub>, 7 mM DTT or medium alone (control).

Left: representative images resulting from excitation at 405 nm (false-coloured in blue) and from excitation at 488 nm (false-coloured in green) and represented as overlays. Scale bar 20µm. Right: mean ratio traces +/- SEM of emission intensities of 3 independent cells excited at 405 nm or 488 nm.

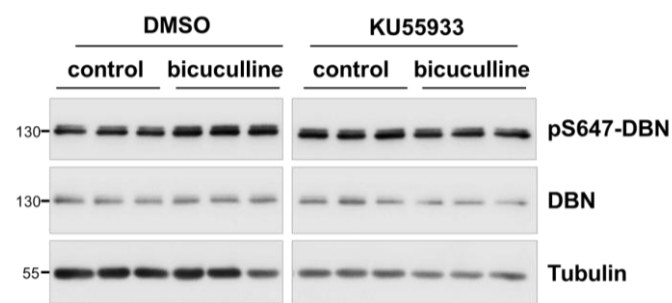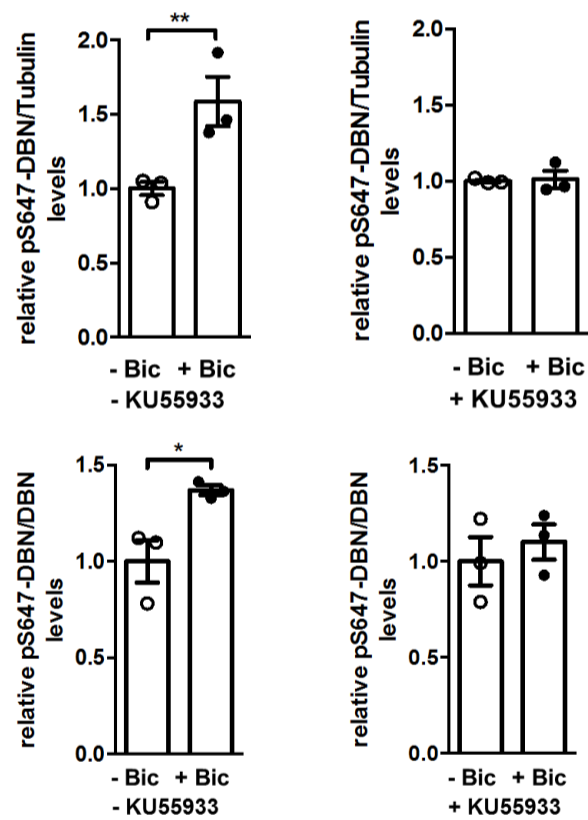

**Supplementary Figure 2. ATM inhibition abolished bicuculline induced DBN phosphorylation at S647**

Hippocampal rat neurons were treated with bicuculline (30  $\mu$ M) for 1 h in the presence of DMSO (-) or 10  $\mu$ M ATM inhibitor (KU55933) (+). Bar graph shows the relative band density of pS647-DBN/Tubulin and pS647-DBN/DBN in 3 biologically independent samples +/- SEM; One way ANOVA Bonferroni test. \*\* $p < 0.01$

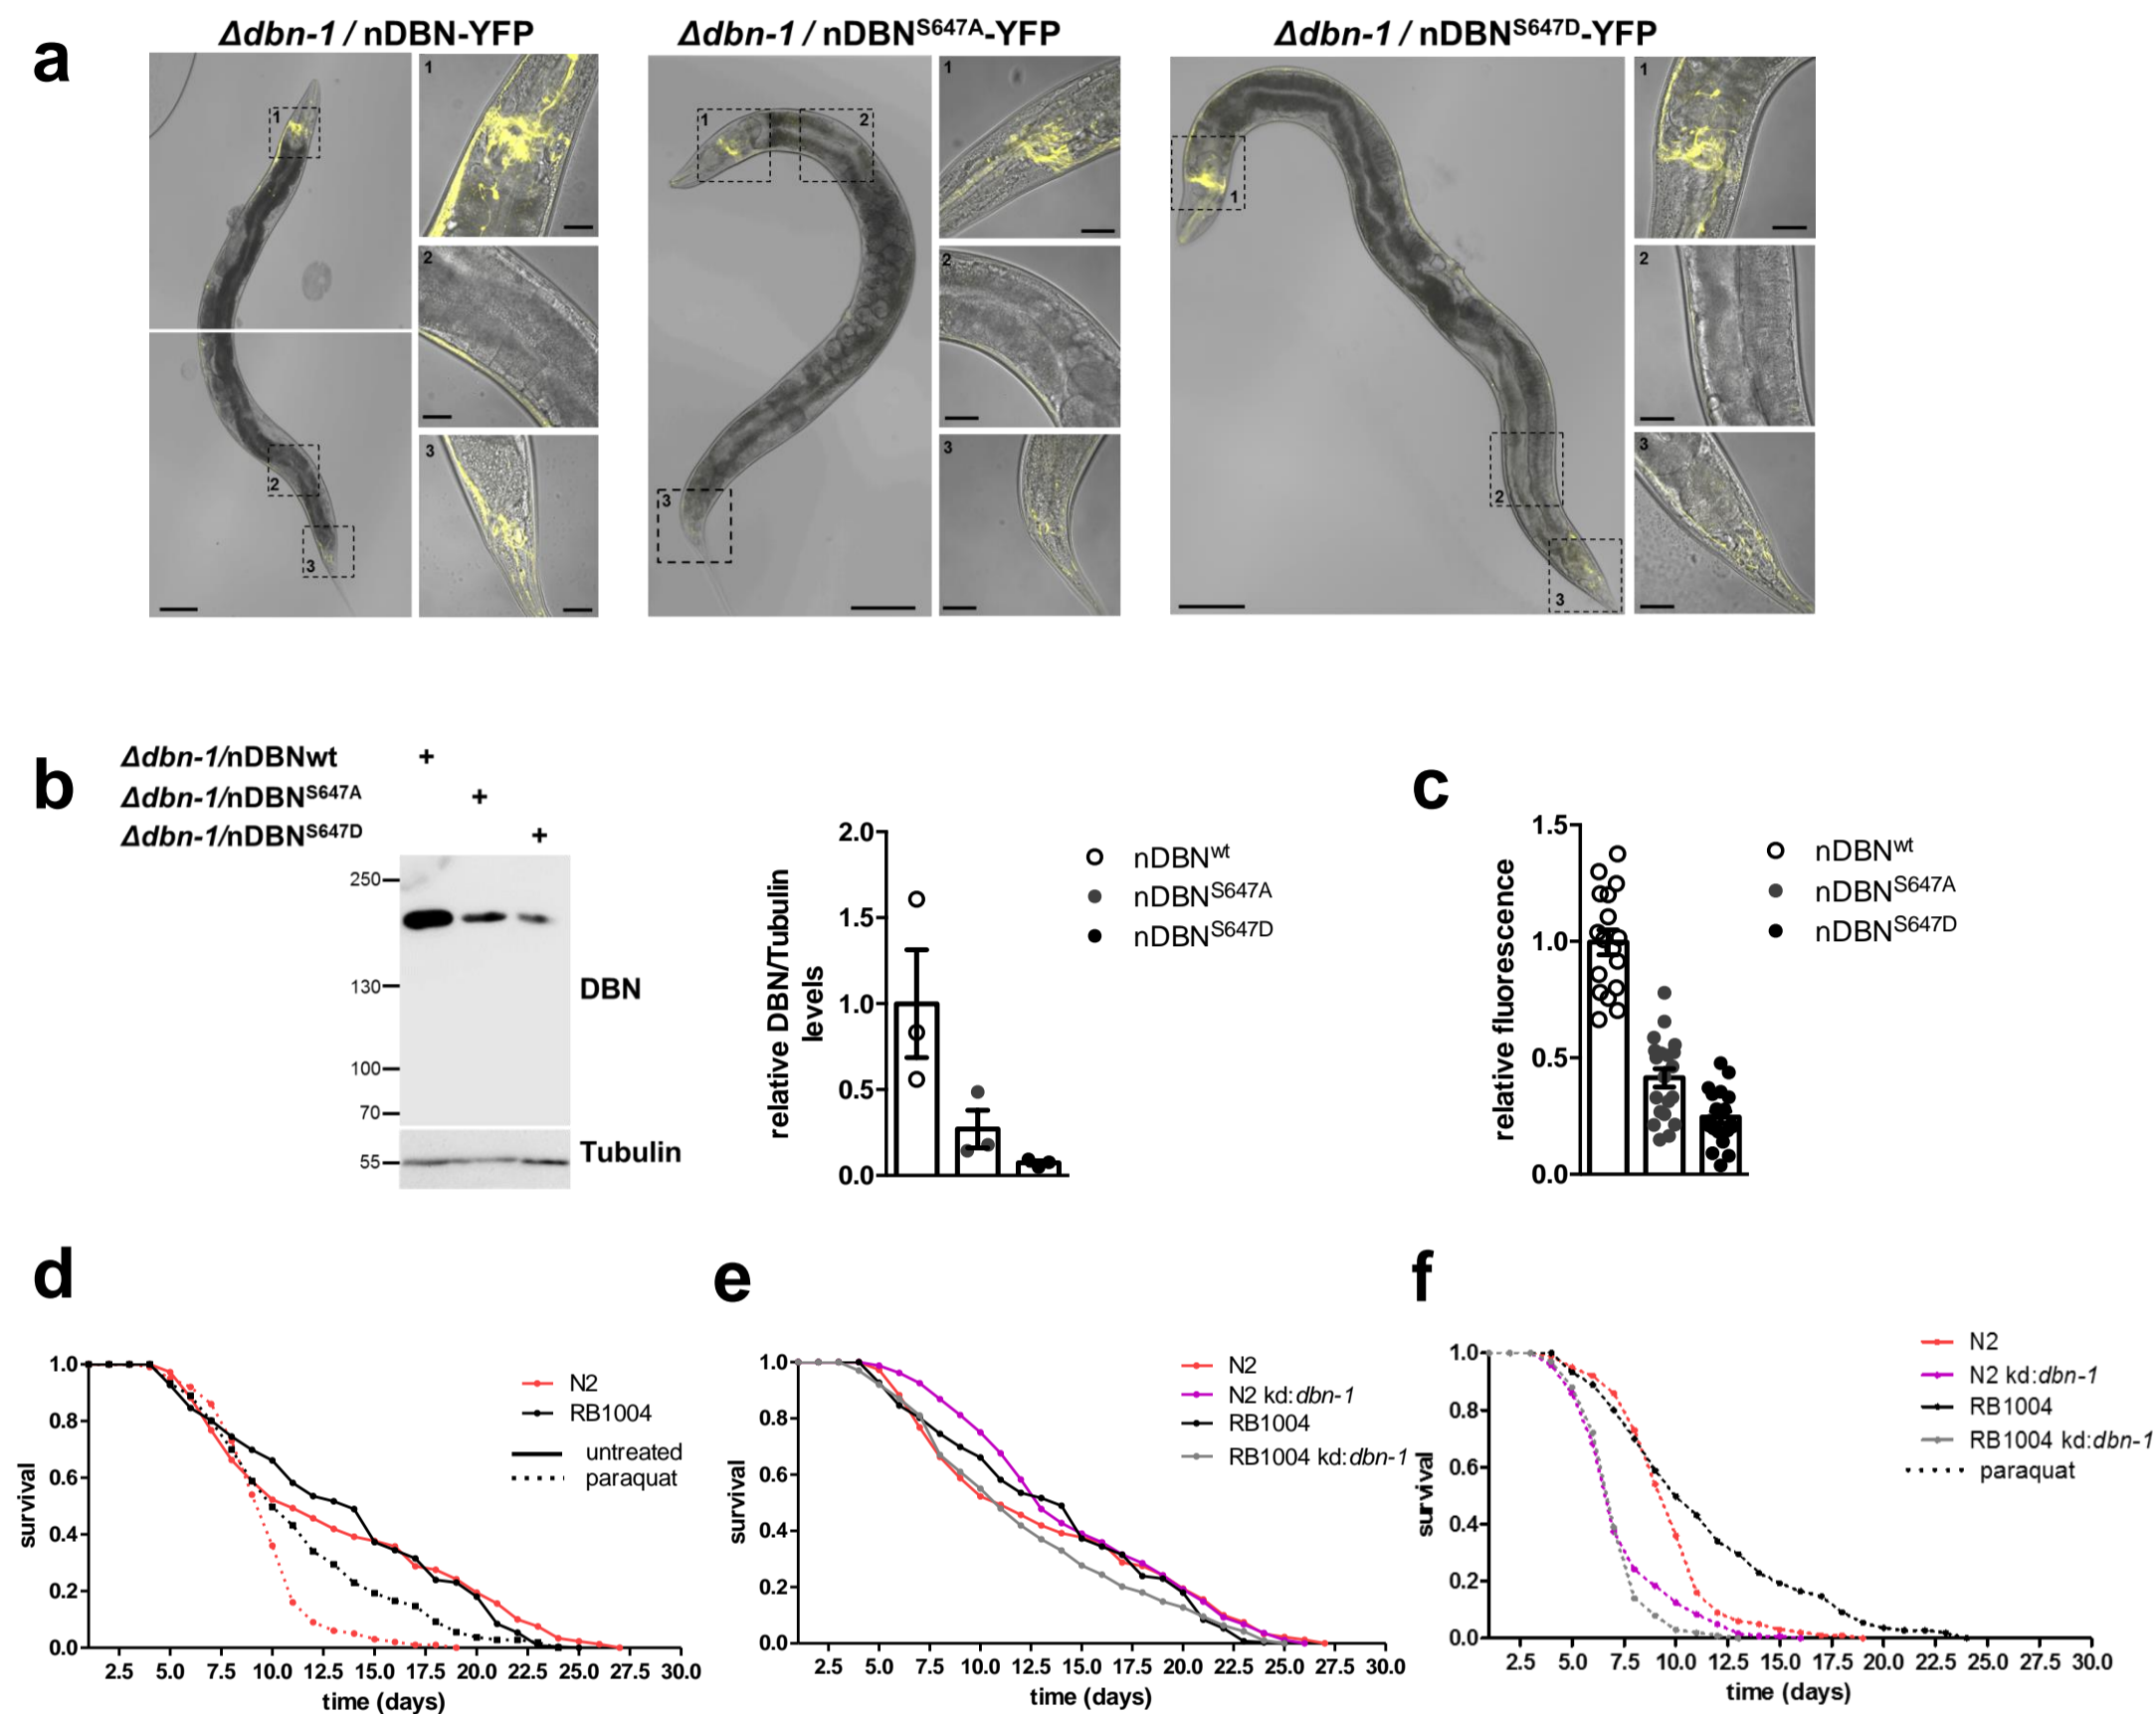

### Supplementary Figure 3. Characterisation of $\Delta dbn-1$ *C. elegans* lines

Characterisation of wild type (N2), partial knockout (RB1004) and complete knockout (JKM1) of *dbn-1* upon knockdown of *dbn-1* and treated with or without Paraquat to induce oxidative stress. N=number of cohorts, n=number of worms per cohort.

(a) Pan-neuronal expression of human DBN-YFP (nDBN), DBNS647A-YFP (nDBNS647A) and DBNS647D-YFP (nDBNS647D). Left: confocal images of entire nematodes with 3 insets magnified to show head (1), nerve cord (2) and tail (3). Scale bar 100  $\mu$ m, inset scale bar 25  $\mu$ m.

(b) Western blot of total lysates from strains nDBN, nDBNS647A and nDBNS647D detecting DBN-YFP fusion proteins at approx. 180 kDa (using M2F6 Drebrin-antibody) and alpha-tubulin. Bar graph shows the relative band density DBN/Tubulin in 3 independent worm cohortsexperiments. Depicted is mean  $\pm$  SEM.

(c) Quantification of relative DBN-variants expression in nDBN-YFP, nDBNS647A-YFP and nDBNS647D-YFP by measurement of the YFP-fluorescence in the head region of 17 - 20 individual nematodes per strain. Depicted is mean  $\pm$  SEM. nDBNwt: N=1, n=17; nDBNS647A: N=1, n=20; nDBNS647D: n=1, n=20.

(d) Lifespan assay showing the cumulative survival probability of N2 and RB1004 treated with paraquat (dashed line, N2: N=1, n=101; RB1004: N=1, n=120) or untreated (continuous line, N2: N=1, n=150; RB1004: N=1, n=179). Cohort sizes = 100 – 150 nematodes.

(e) Cumulative survival probability of untreated N2 (red, N=1, n=150) and RB1004 (black, N=1, n=179) nematodes and *dbn-1* RNAi-treated N2 (magenta, N=1, n=160) and RB1004 (grey, N=1, n=100).

(f) Cumulative survival probability of untreated N2 (red, N=1, n=101) and RB1004 (black, n=1, n=120) nematodes and *dbn-1* RNAi-treated N2 (magenta, n=1, n=120) and RB1004 (grey, n=1, n=120), all treated with paraquat.

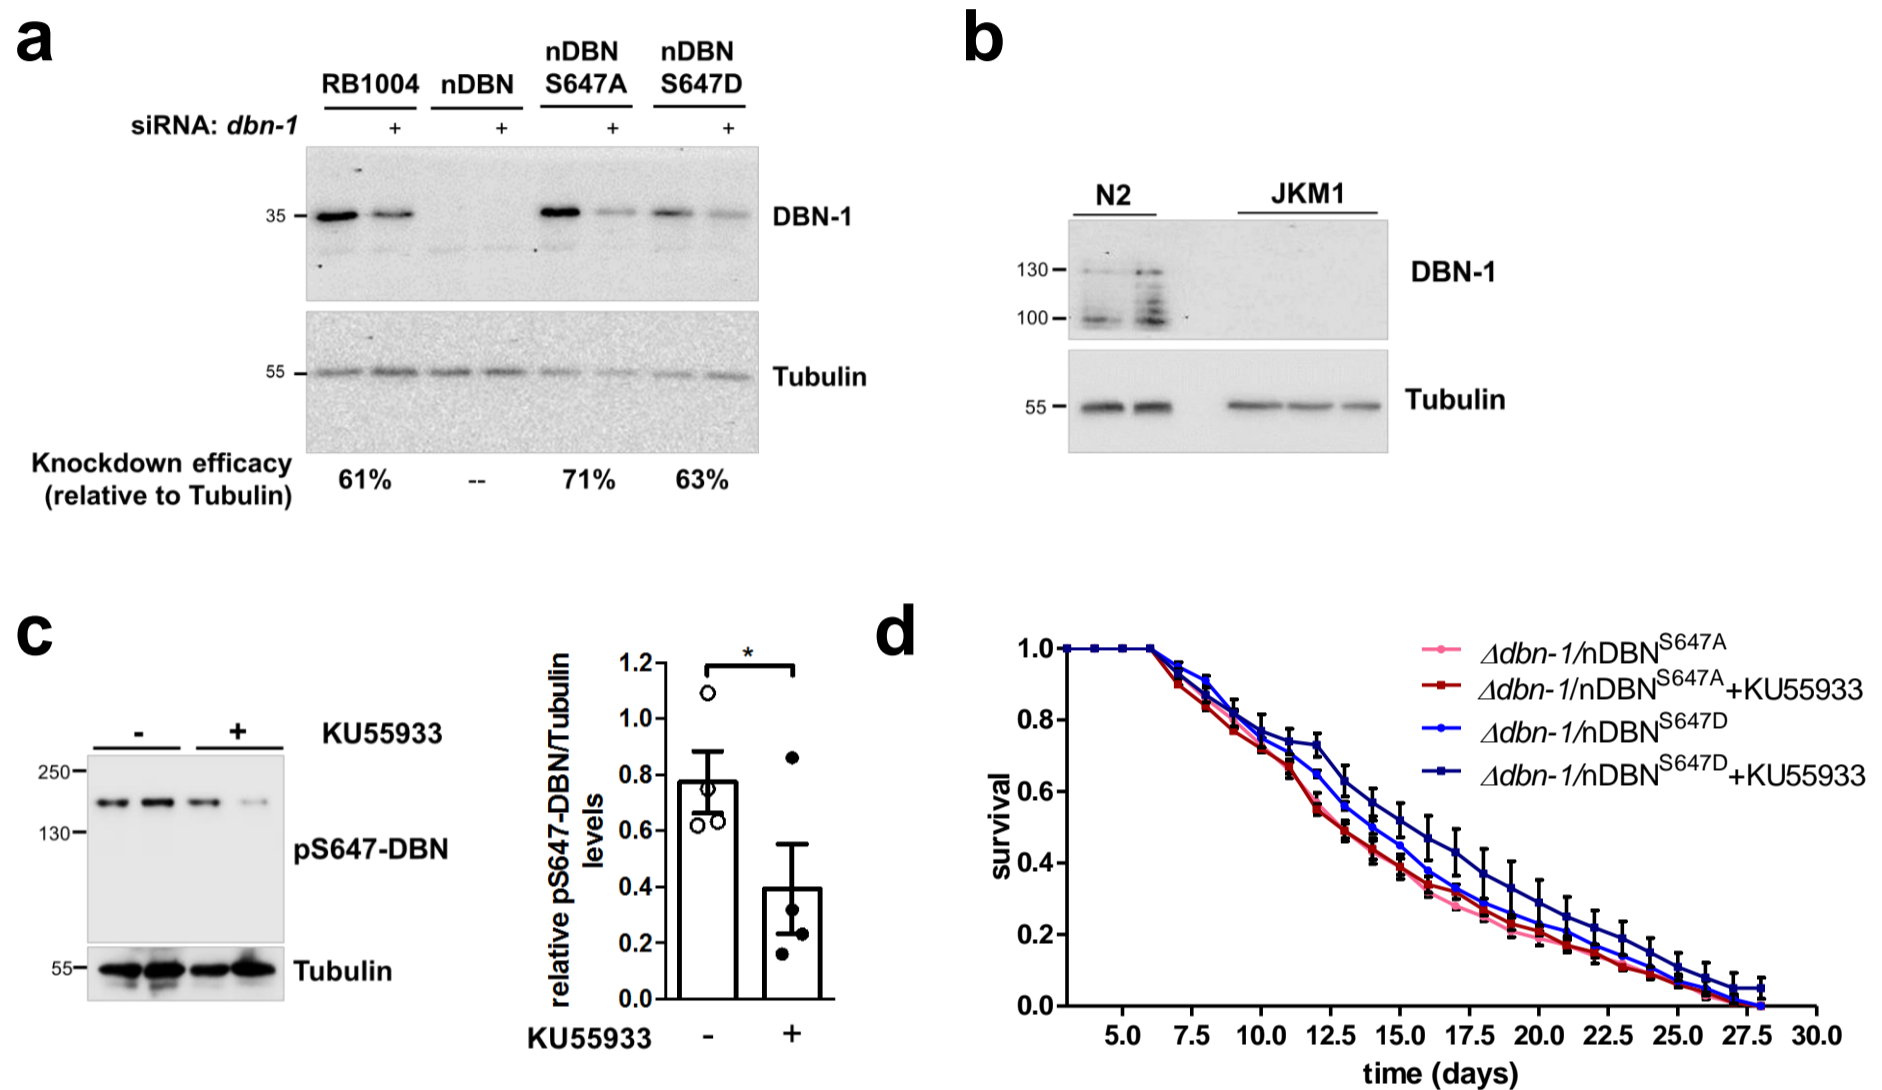

#### Supplementary Figure 4. Characterization of *Ddbn-1* *C. elegans* and efficacy of KU55933

(a) Verification of *dbn-1* knockdown in nDBN strains and in partial knockout strain RB1004 using no siRNA or *dbn-1* si-RNA (+). Nematode lysates were analysed by western blot using a *C. elegans*-specific DBN-1 antibody to detect truncated nematode DBN-1 (35 kDa) and  $\alpha$ -Tubulin serving as loading control. Two technical replicates were analysed for each condition. Knockdown efficacy was determined by measuring band density of DBN-1 over tubulin.

(b) Validation of the CRISPR/Cas9 generated knockout of *C. elegans dbn-1* by western blot. N2 lysates (two technical replicates) and JKM1 lysates (three technical replicates) were analysed using a *C. elegans*-specific DBN-1 antibody. As previously demonstrated<sup>30</sup>, several bands were detected with DBN-1 antibody between 100 and 130 kDa in wild type animals (N2) (left). These bands were absent in the *dbn-1* knockout line (JKM1) (right).

(c) Reduction of pS647-DBN upon treatment with ATM kinase inhibitor KU55933. *C. elegans*  $\Delta dbn-1/nDBN$  were synchronised, grown until L4 stage and treated with 1 mM KU55933 (+) or 2% DMSO (-) for 24 h. Left: Western blot analysis of nematodes lysates analysed by western blot using pS647-DBN and  $\alpha$ -Tubulin antibodies. Right: Bar graph shows the relative band density of pS647-DBN/Tubulin of 2 technical replicates in 2 biologically independent experiments +/- SEM; T-test. \* $p < 0.05$ .

(d) Lifespan analysis of phospho/dephospho-variant nDBN strains. Shown is the cumulative survival probability of nDBN<sup>S647A</sup> and nDBN<sup>S647D</sup> treated with or without ATM kinase inhibitor KU55933.  $\Delta dbn-1/DBNS647A$ : N=3, n=100-105;  $\Delta dbn-1/DBNS647D$ : N=3, n=90-106 where N represents the number of cohorts and n the number of worms per cohort.

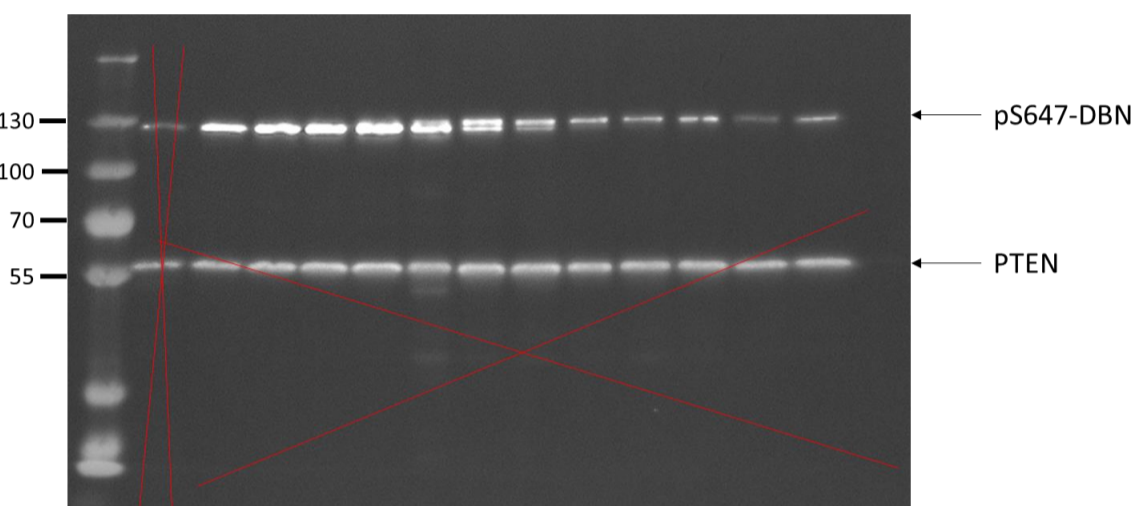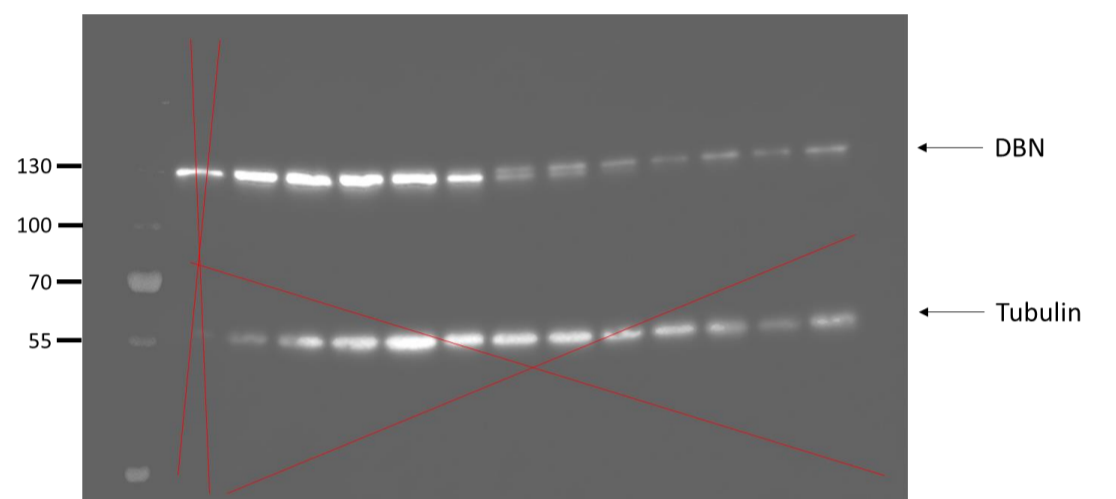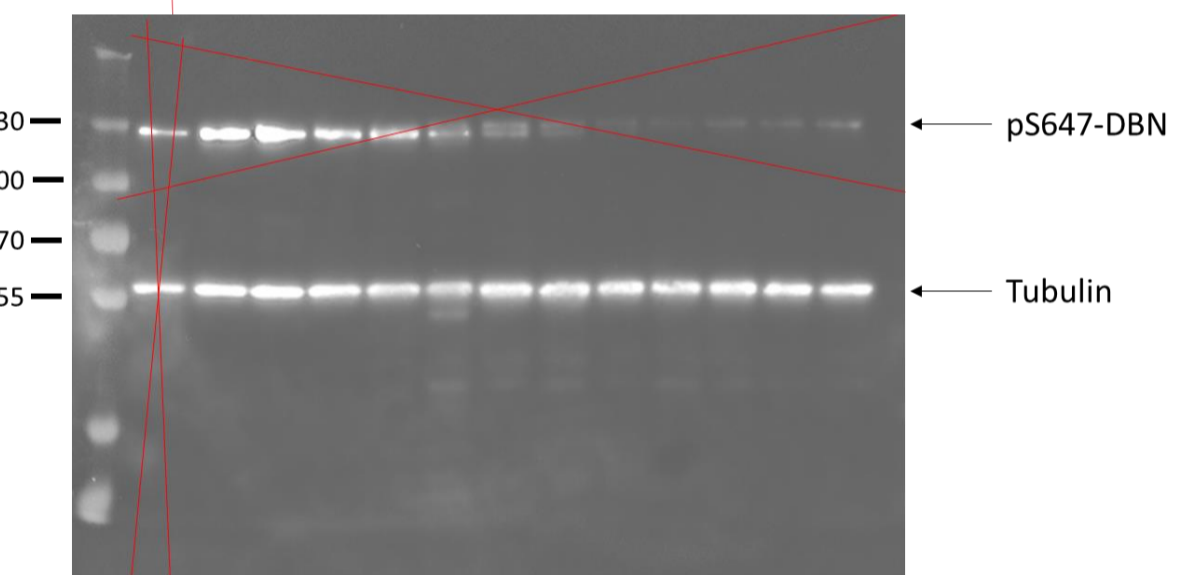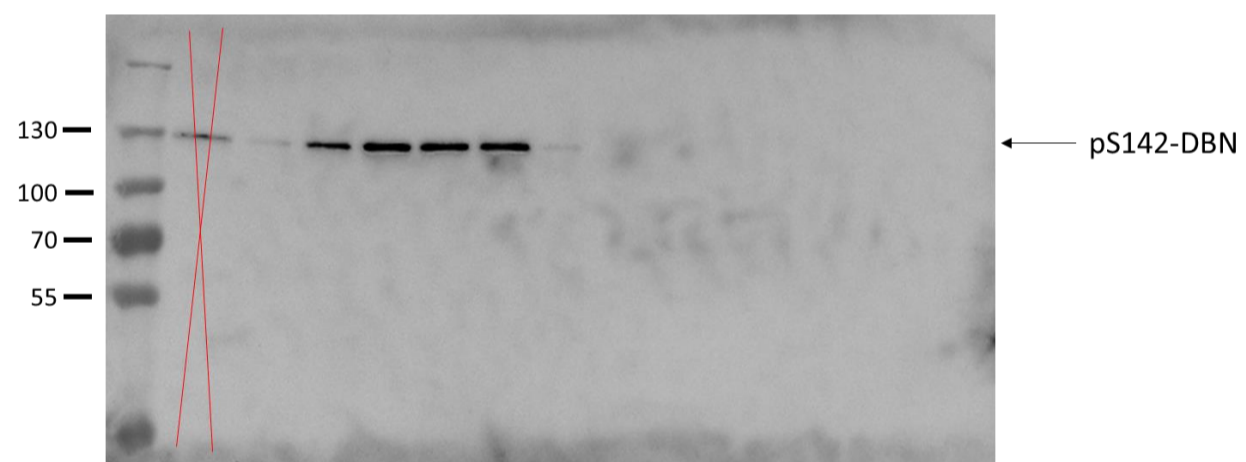

**Supplementary figure 5. Uncropped western blots related to Figure 2a**

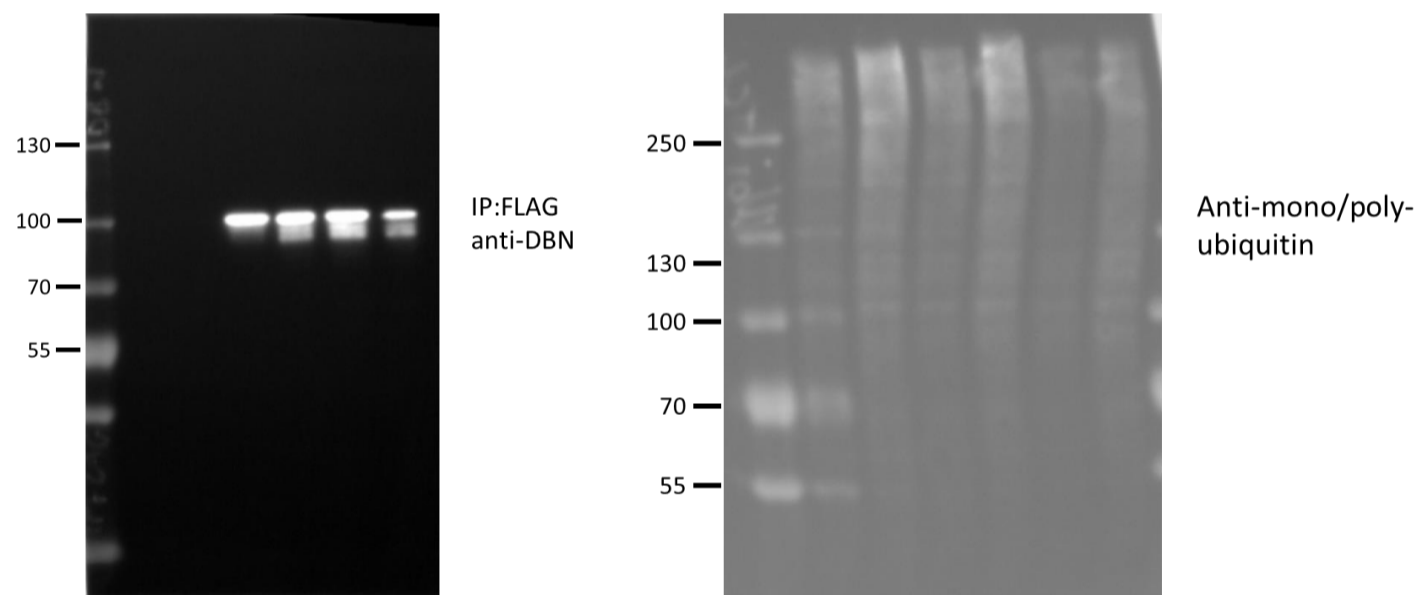

**Supplementary figure 6. Uncropped western blots related to Figure 2f**

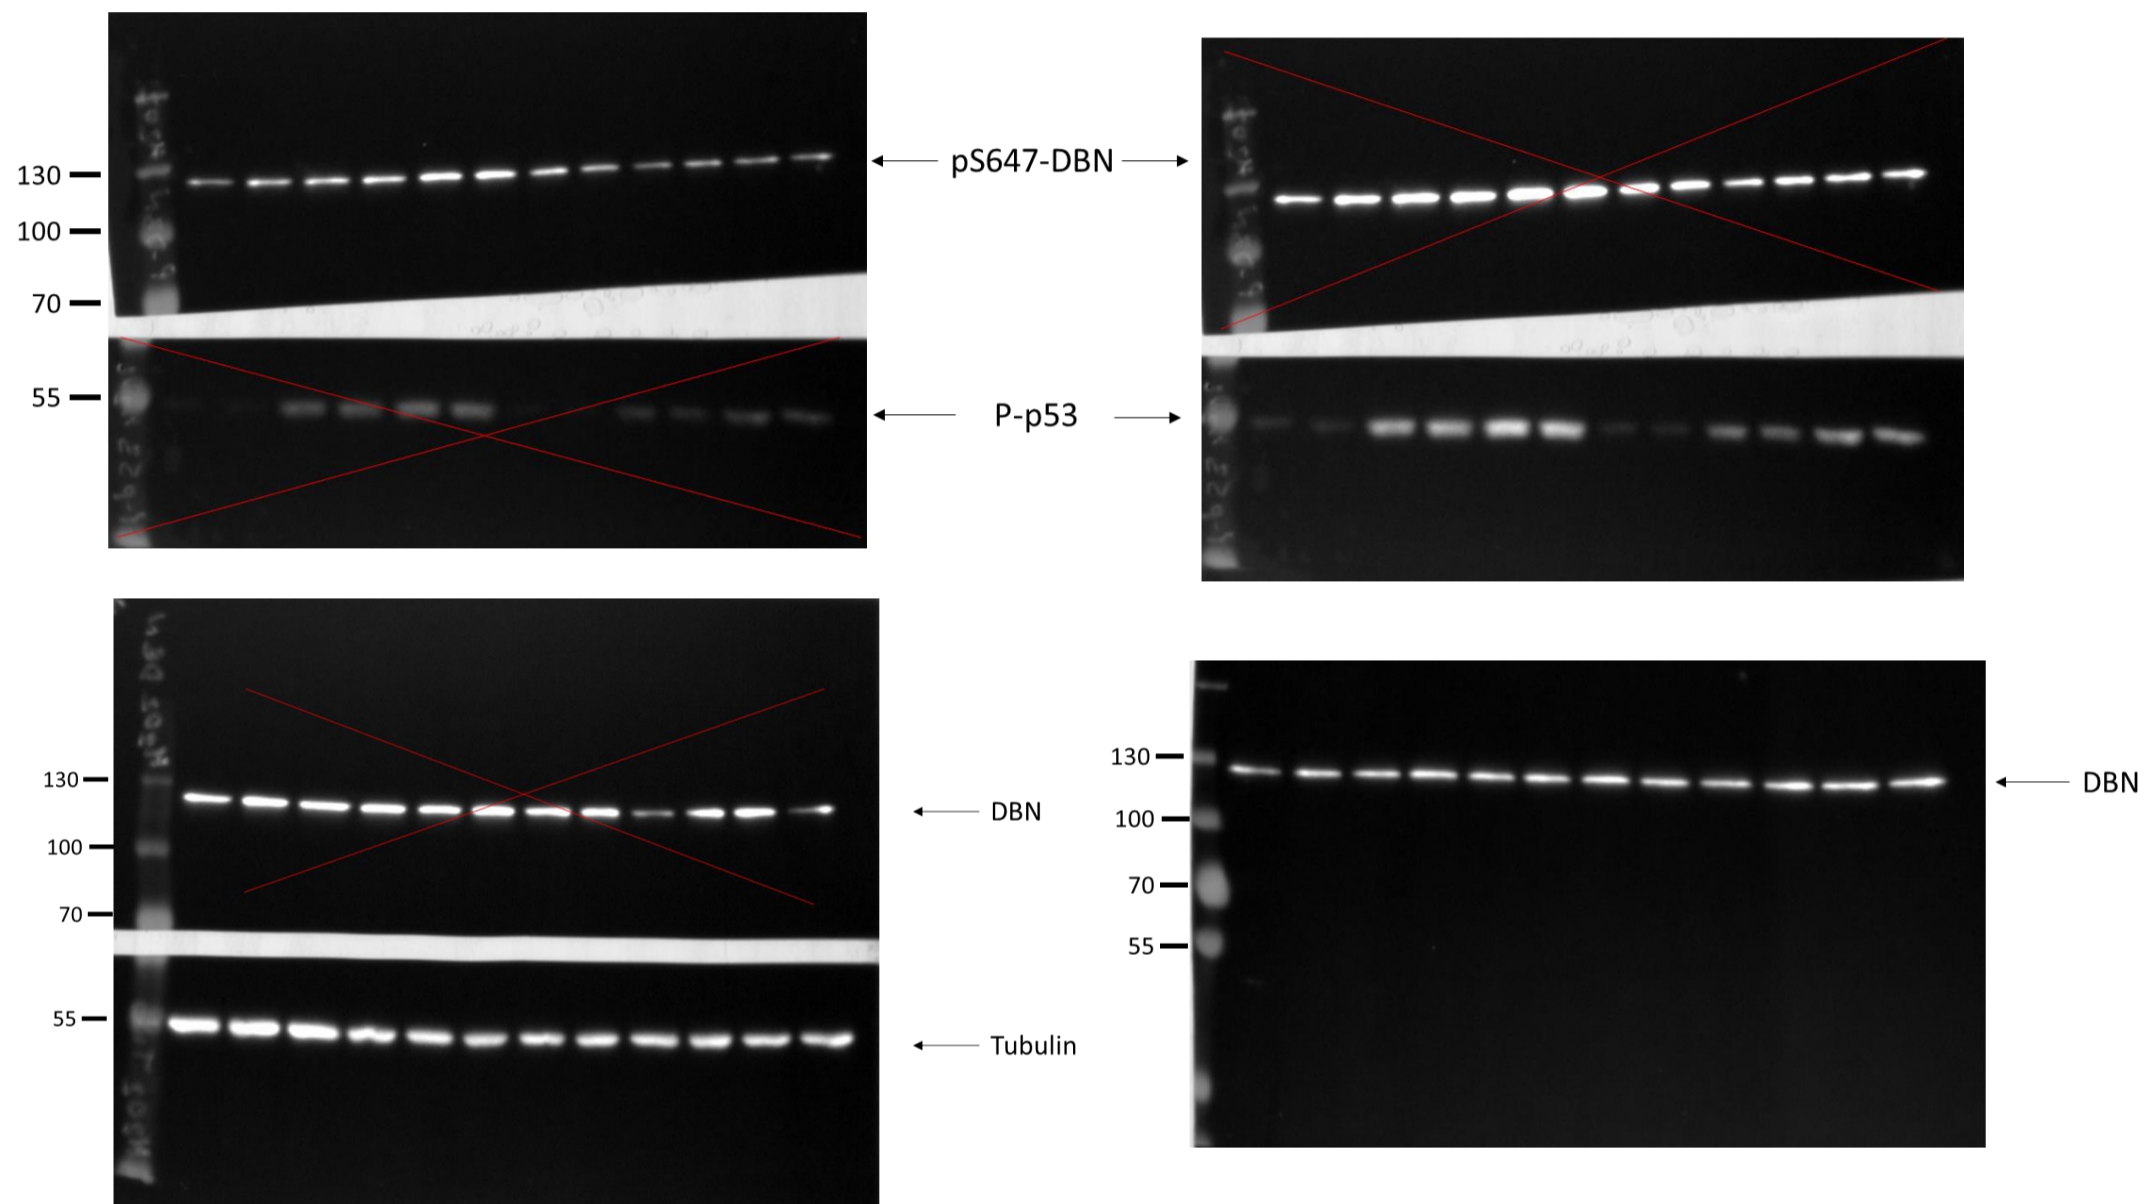

Supplementary figure 7. Uncropped western blots related to Figure 4c



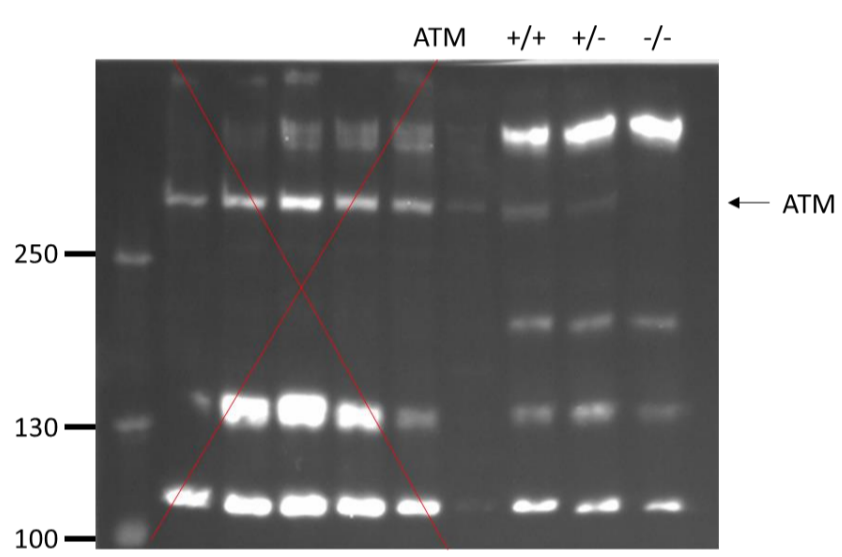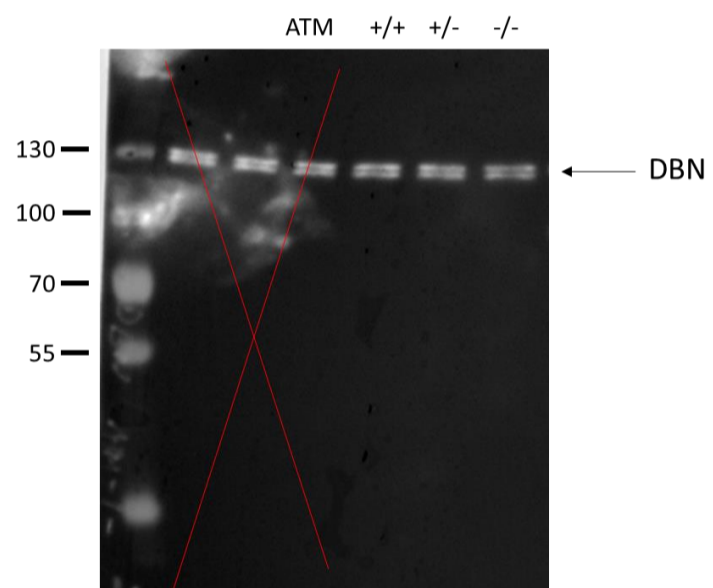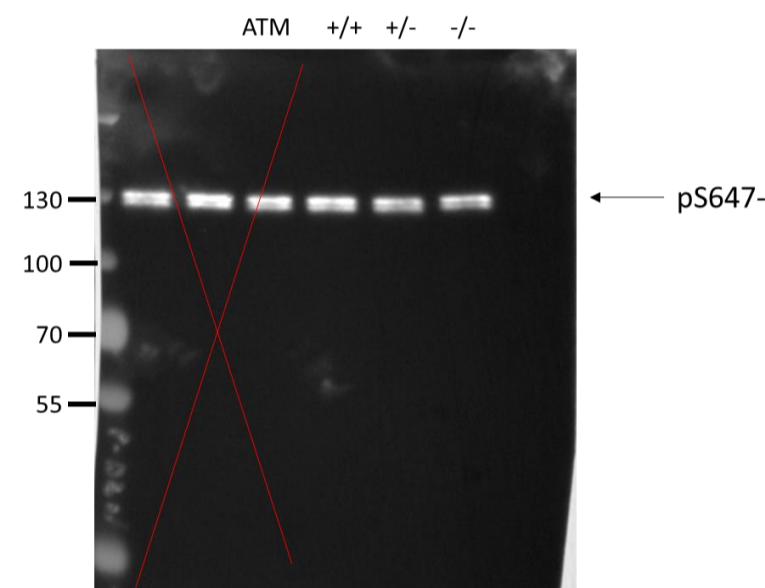

Supplementary figure 8. Uncropped western blots related to Figure 5d

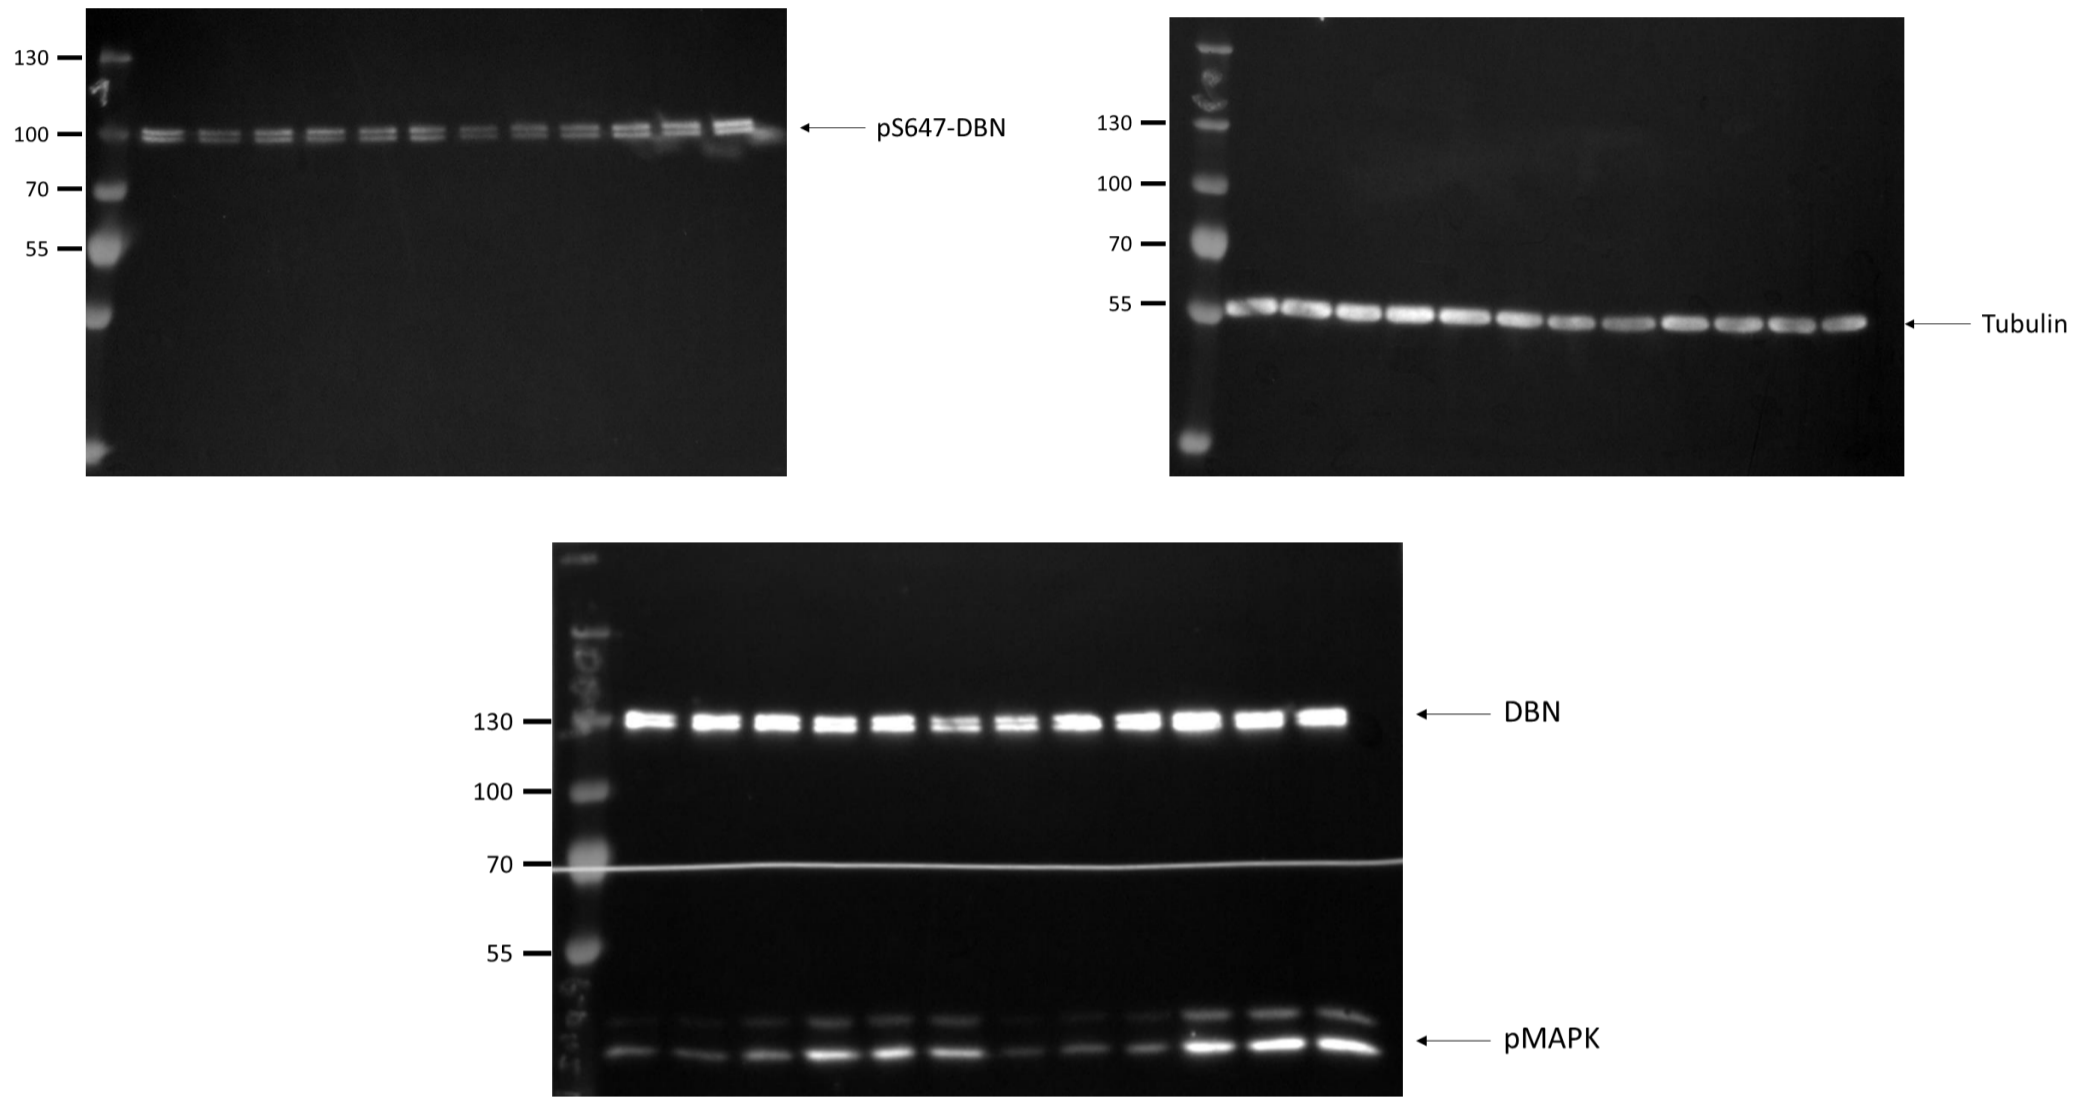

**Supplementary figure 9. Uncropped western blots related to Figure 5e**
